# Supplementary material for: Mechanism insights into the role of the support mineralization layer toward ultrathin polyamide nanofilms for ultrafast molecular separation
Source: Royal Society of Chemistry journal article supplement (doi:10.1039/d1ta07413j), 2021-01-01
Supplement: d1ta07413j2.pdf [file d1ta07413j2.pdf]

## SUPPORTING INFORMATION

# Mechanism Insights into The Role of Support Mineralization Layer toward Ultrathin Polyamide Nanofilm for Ultrafast Molecular Separation

Qiangqiang Song,<sup>a,b</sup> Yuqing Lin,\*<sup>c</sup> Takafumi Ueda,<sup>a</sup> Titik Istirokhatun,<sup>a,b</sup> Qin Shen,<sup>a,b</sup>

Kecheng Guan,<sup>a</sup> Tomohisa Yoshioka,<sup>a</sup> and Hideto Matsuyama\*<sup>a,b</sup>

<sup>a</sup> Research Center for Membrane and Film Technology, Kobe University, Kobe 657-8501, Japan.

<sup>b</sup> Department of Chemical Science and Engineering, Kobe University, Kobe 657-8501, Japan.

<sup>c</sup> School of Resources and Environmental Engineering, East China University of Science and Technology, Shanghai, 200237, China

To whom all correspondence should be addressed.

Email: [linyuqing@ecust.edu.cn](mailto:linyuqing@ecust.edu.cn); [matuyama@kobe-u.ac.jp](mailto:matuyama@kobe-u.ac.jp);

## Table of Contents

|                                                                                                                                                                                                                                                                                                                                               |    |
|-----------------------------------------------------------------------------------------------------------------------------------------------------------------------------------------------------------------------------------------------------------------------------------------------------------------------------------------------|----|
| <b>Fig. S1</b> Surface zeta potential of pristine PSf, APTES-d-PSf and SiO <sub>2</sub> /PSf ultrafiltration membranes.....                                                                                                                                                                                                                   | 4  |
| <b>Fig. S2</b> (a) The model SiO <sub>2</sub> , CNT <sub>N/S</sub> , CNT and PA and corresponding chemical formula used in this MD simulation; (b) snapshots of SiO <sub>2</sub> -PA system, CNT <sub>N/S</sub> -PA system and CNT-PA system at their specific distance of lowest interaction energy in MD simulation. ....                   | 5  |
| <b>Fig. S3</b> AFM topographic images (left-hand panel), height profile (middle panel) and AFM surface 3D morphology images (right-hand panel) of pristine PSf (a, c, e) and SiO <sub>2</sub> _4h/PSf (b, d, f) ultrafiltration membranes. ....                                                                                               | 6  |
| <b>Fig. S4</b> Pore size and pore size distribution of pristine PSf and SiO <sub>2</sub> /PSf membrane substrates. ....                                                                                                                                                                                                                       | 7  |
| <b>Fig. S5</b> Surface wettability of pristine PSf and various SiO <sub>2</sub> /PSf membranes. ....                                                                                                                                                                                                                                          | 8  |
| <b>Fig. S6</b> Pure water permeance of pristine PSf and SiO <sub>2</sub> /PSf supports.....                                                                                                                                                                                                                                                   | 9  |
| <b>Fig. S7</b> FESEM images of (a) pristine PSf, (b) SiO <sub>2</sub> _4h_PSf without APTES pre-treatment, (c) SiO <sub>2</sub> _1h/PSf, (d) SiO <sub>2</sub> _2h/PSf, (e) SiO <sub>2</sub> _4h/PSf, and (f) SiO <sub>2</sub> _6h/PSf porous supports. ....                                                                                   | 10 |
| <b>Fig. S8</b> XPS characterization of (a) wide scan and core-level narrow scan of (b) O 1s and (c) Si 2p <sub>3/2</sub> elements of pristine PSf and SiO <sub>2</sub> /PSf ultrafiltration membranes.....                                                                                                                                    | 12 |
| <b>Fig. S9</b> FTIR characterization of pristine PSf, SiO <sub>2</sub> _1h/PSf, SiO <sub>2</sub> _2h/PSf, SiO <sub>2</sub> _4h/PSf, and SiO <sub>2</sub> _6h/PSf membranes. ....                                                                                                                                                              | 13 |
| <b>Fig. S10</b> Profiles of MD simulation of (a) n-hexane-water system and (b) n-hexane-water (hide)-SiO <sub>2</sub> system.....                                                                                                                                                                                                             | 14 |
| <b>Fig. S11.</b> (a) The size and volume of SiO <sub>2</sub> nanoparticles was calculated by locating them inside a rectangular parallelepiped (with the outer surface of the cuboid tangent to the outermost atoms of SiO <sub>2</sub> ); (b) interatomic distance between the centers of atoms (the radius of atom ball size is 0.5 Å)..... | 15 |
| <b>Fig. S12</b> (a) Pictures of the n-hexane-water (hide) interface in the presence of SiO <sub>2</sub> particles; chemical interactions of SiO <sub>2</sub> particles with (b) water molecules and (c) PIP molecules via hydrogen bonding.....                                                                                               | 16 |
| <b>Fig. S13</b> (a) Pure water permeance and (b) inorganic salt rejection ratio of PA_SiO <sub>2</sub> _4h/PSf TFC membrane fabricated at various PIP concentrations and the same TMC concentration of 0.1% (w/v) with a reaction duration of 30 s.....                                                                                       | 17 |
| <b>Fig. S14</b> (a) Pure water permeance and (b) inorganic salt rejection ratio of PA_SiO <sub>2</sub> _4h/PSf TFC membranes fabricated at various TMC concentrations and the same PIP concentration of 0.2% (w/v) with a reaction duration of 30 s.....                                                                                      | 18 |
| <b>Fig. S15</b> (a) Pure water permeance and (b) inorganic salt rejection ratio of PA_SiO <sub>2</sub> _4h/PSf TFC membranes fabricated at various reaction durations. All membranes were formed with the same PIP (0.2% (w/v)) and TMC (0.1% (w/v)) concentrations.....                                                                      | 19 |
| <b>Fig. S16</b> Surface potential of pristine PA and PA_SiO <sub>2</sub> /PSf TFC membranes. All the                                                                                                                                                                                                                                          |    |

|                                                                                                                                                                                                                                     |    |
|-------------------------------------------------------------------------------------------------------------------------------------------------------------------------------------------------------------------------------------|----|
| measurements were performed at 398 K and repeated four times. ....                                                                                                                                                                  | 20 |
| <b>Fig. S17</b> (a) XPS characterizations of (a) wide scan and core-level narrow scan of (b) C 1s, (c) O 1s, and (d) N 1s elements of pristine PA and PA_SiO <sub>2</sub> /PSf TFC membranes. ....                                  | 21 |
| <b>Fig. S18</b> Crosslinking degree of pristine PA and PA_SiO <sub>2</sub> /PSf TFC membranes. ....                                                                                                                                 | 23 |
| <b>Fig. S19</b> ATR-FTIR spectra of pristine PA and PA_SiO <sub>2</sub> /PSf TFC membranes. ....                                                                                                                                    | 24 |
| <b>Fig. S20</b> Long-term filtration of pristine PA and PA_SiO <sub>2</sub> /PSf TFC membranes for pure water and 1000 ppm Na <sub>2</sub> SO <sub>4</sub> aqueous solution under 10 bar and 398 K for 2400 min. ....               | 25 |
| <b>Fig. S21</b> Perm-selectivity of pristine PA and PA_SiO <sub>2</sub> _4h/PSf TFC membranes toward Na <sub>2</sub> SO <sub>4</sub> aqueous solution (1000 ppm) under varied transmembrane pressure (5–20 bar). ....               | 26 |
| <b>Fig. S22</b> Influence of Na <sub>2</sub> SO <sub>4</sub> concentration on the perm-selectivity of the pristine PA and PA_SiO <sub>2</sub> _4h/PSf TFC membranes. The filtration testing was performed at 10 bar and 398 K. .... | 27 |
| <b>Fig. S23</b> FESEM images with pristine PA (left-hand panel) and PA_SiO <sub>2</sub> _4h/PSf membranes (right-hand panel) before (a, c) and after (b, d) long-term pure water filtration. ....                                   | 28 |
| <b>Fig. S24</b> The distance dependent interaction energy variations of the SiO <sub>2</sub> -PA, CNT <sub>N/S</sub> -PA and CNT-PA systems. ....                                                                                   | 29 |
| <b>Table S1</b> Surface profiles of pristine PSf and SiO <sub>2</sub> _4h/PSf porous membranes acquired from AFM characterization over a scanning area of 10 μm × 10 μm. ....                                                       | 30 |
| <b>Table S2</b> Atomic composition of porous supports calculated by XPS measurements. ....                                                                                                                                          | 31 |
| <b>Table S3</b> Surface properties of pristine PA and PA_SiO <sub>2</sub> /PSf TFC membranes. These results were acquired from AFM measurements over a scanning area of 20 μm × 20 μm. ....                                         | 32 |
| <b>Table S4</b> Summary of PIP storage capacity, PIP diffusion rate $S_{PIP-O}$ , within the first 30 s), and relative monomer diffusion rate ( $D_r$ ; within the first 30 s) on various substrates. ....                          | 33 |
| <b>Table S6</b> Atomic composition and degree of crosslinking of pristine PA and PA_SiO <sub>2</sub> /PSf membranes. ....                                                                                                           | 35 |
| <b>Table S8</b> Performance of reported state-of-the-art nanofiltration membranes. ....                                                                                                                                             | 37 |
| <b>References</b> .....                                                                                                                                                                                                             | 39 |

## Results and Discussion

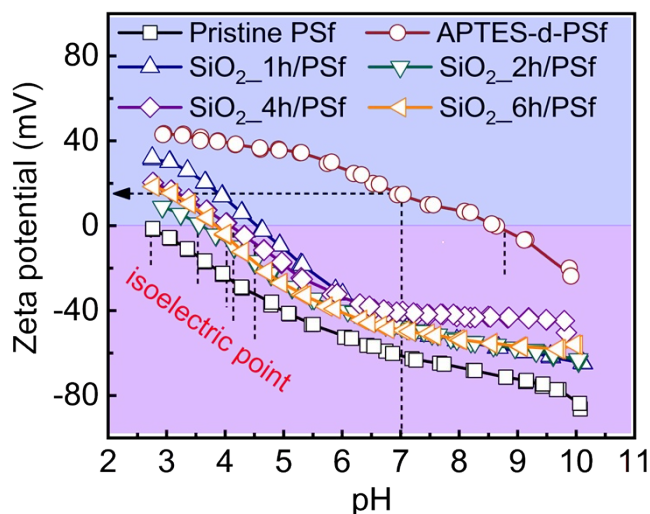

**Fig. S1** Surface zeta potential of pristine PSf, APTES-d-PSf, and SiO<sub>2</sub>/PSf ultrafiltration membranes.

The membrane surface zeta potentials were estimated by measuring the zeta potentials in a background electrolyte solution of 1 mM KCl. As shown in **Fig. S1**, the virgin PSf is negatively charged (-62.55 mV) at neutral condition (pH=7) with an isoelectric point (IEP) of 2.72. The APTES-d-PSf is positively charged with a surface potential of 18.69 mV (pH=7) and IEP of 8.77 ascribing to the deposited positive APTES polyelectrolyte layer after the poly-condensation process.<sup>1-3</sup> And the SiO<sub>2</sub>/PSf membranes are negatively charged with silicification durations goes on. Taking SiO<sub>2</sub>\_2h/PSf membrane as an example, a negative surface (IEP: 3.52) with -47.48 mV surface potential at a neutral condition (pH value of 7) could be obtained

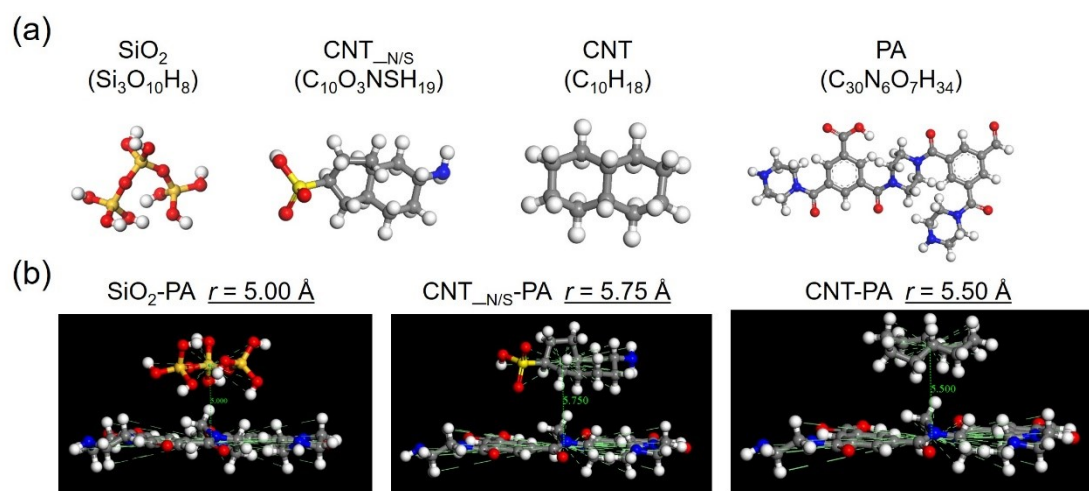

**Fig. S2** (a) The chemical structures of  $\text{SiO}_2$ ,  $\text{CNT}_{\text{N/S}}$ ,  $\text{CNT}$ , and  $\text{PA}$ ; (b) snapshots of  $\text{SiO}_2\text{-PA}$ ,  $\text{CNT}_{\text{N/S}}\text{-PA}$ , and  $\text{CNT-PA}$  at the lowest interaction energy positions.

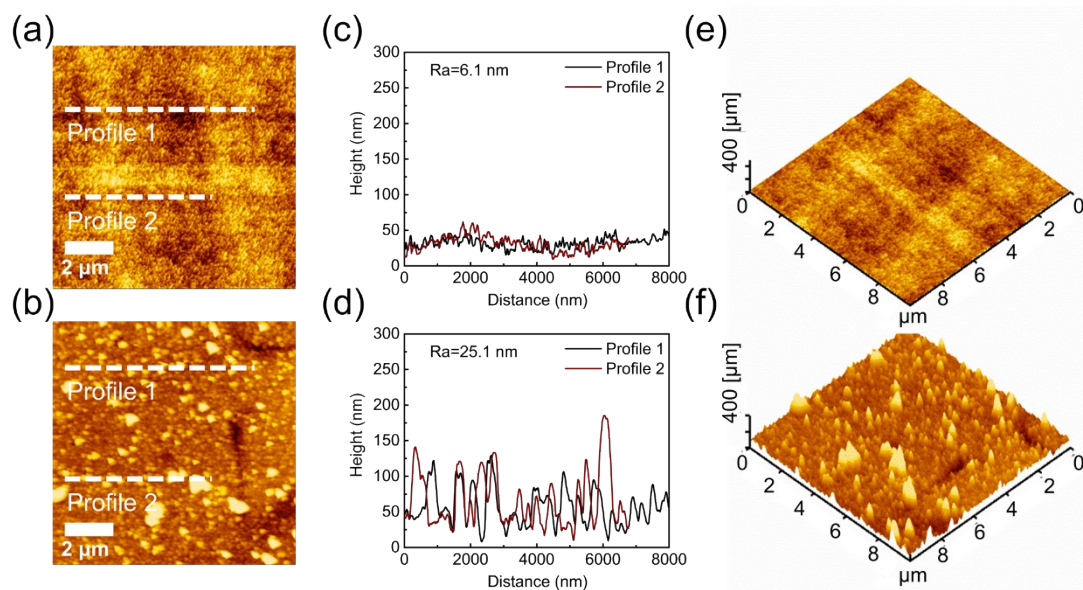

**Fig. S3** AFM topographic images (left-hand panel), height profile (middle panel), and AFM surface 3D morphology images (right-hand panel) of pristine PSf (a, c, e) and SiO<sub>2</sub>\_4h/PSf (b, d, f) ultrafiltration membranes.

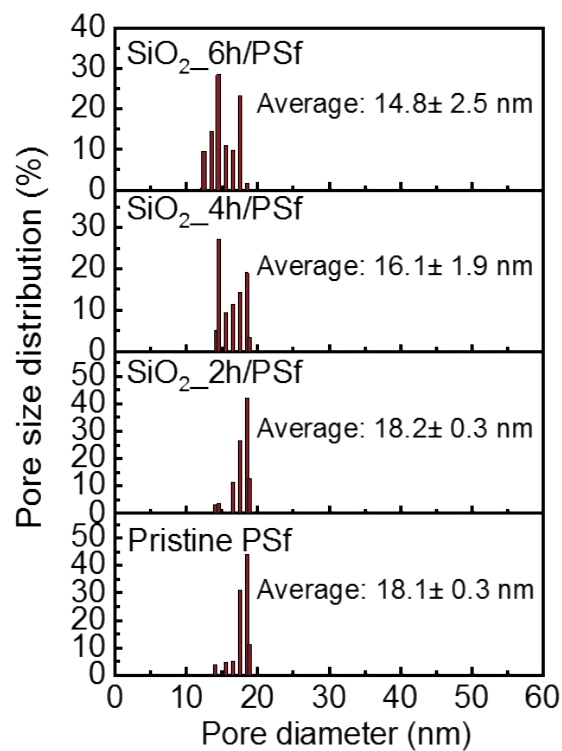

**Fig. S4** Pore size and pore size distribution of pristine PSf and SiO<sub>2</sub>/PSf membrane substrates.

The pore size of PSf membranes tends to decrease because of the larger SiO<sub>2</sub> nucleus inside/surficial deposition accompanied by the possible pore blocking effect with prolonged silicification durations.

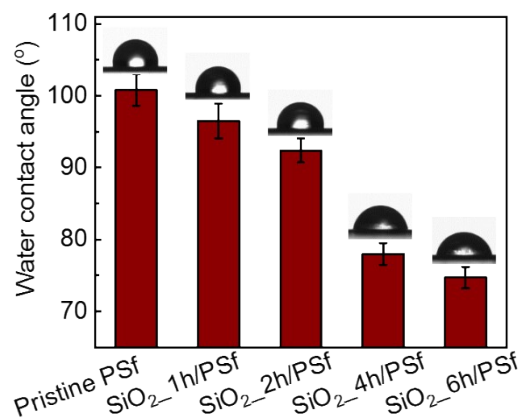

**Fig. S5** Surface wettability of pristine PSf and various SiO<sub>2</sub>/PSf membranes.

The water contact angles of the PSf-based supporting membranes were 100.8°, 96.5°, 92.4°, 78.1°, and 74.9° for pristine PSf, SiO<sub>2</sub>\_1h/PSf, SiO<sub>2</sub>\_2h/PSf, SiO<sub>2</sub>\_4h/PSf, and SiO<sub>2</sub>\_6h/PSf membranes, respectively. This indicates that the wettability of the substrate surface could be controlled by changing the mineralization duration.



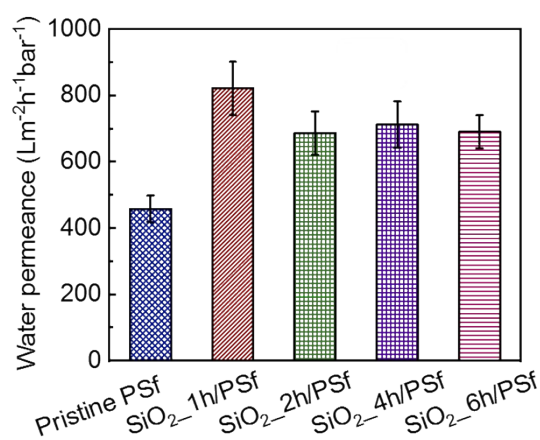

**Fig. S6** Pure water permeance of pristine PSf and SiO<sub>2</sub>/PSf supports.

The filtration tests were performed in a crossflow system with an effective test area of  $8.05 \times 10^{-4} \text{ m}^2$ . The water flux ( $\text{L} \cdot \text{m}^{-2} \cdot \text{h}^{-1} \cdot \text{bar}^{-1}$ ) of the porous PSf substrates was determined from the variations in the weight of the permeate for a specified time after the permeance reached a steady state. The applied trans-membrane pressure is 0.5 bar with a relatively low circulation flow rate of  $0.01 \text{ L} \cdot \text{min}^{-1}$ . It was calculated based on Equation (3). The water fluxes before and after the silicification treatment process were  $458 \text{ L} \cdot \text{m}^{-2} \cdot \text{h}^{-1} \cdot \text{bar}^{-1}$ ,  $821 \text{ L} \cdot \text{m}^{-2} \cdot \text{h}^{-1} \cdot \text{bar}^{-1}$ ,  $686 \text{ L} \cdot \text{m}^{-2} \cdot \text{h}^{-1} \cdot \text{bar}^{-1}$ ,  $712 \text{ L} \cdot \text{m}^{-2} \cdot \text{h}^{-1} \cdot \text{bar}^{-1}$ , and  $690 \text{ L} \cdot \text{m}^{-2} \cdot \text{h}^{-1} \cdot \text{bar}^{-1}$  for pristine PSf, SiO<sub>2</sub>\_1h/PSf, SiO<sub>2</sub>\_2h/PSf, SiO<sub>2</sub>\_4h/PSf, and SiO<sub>2</sub>\_6h/PSf, respectively. The changes in the pure water permeance can be attributed to the greatly enhanced water affinity (hydrophilicity). It is noted that a denser and thicker mineralization interlayer will have an adverse influence on water permeance, manifested by the slightly decreased water permeance with the excess silicification duration.<sup>1,2</sup> The water permeance was obtained by calculating the average of 3-time measurement results for three samples prepared from different batches.

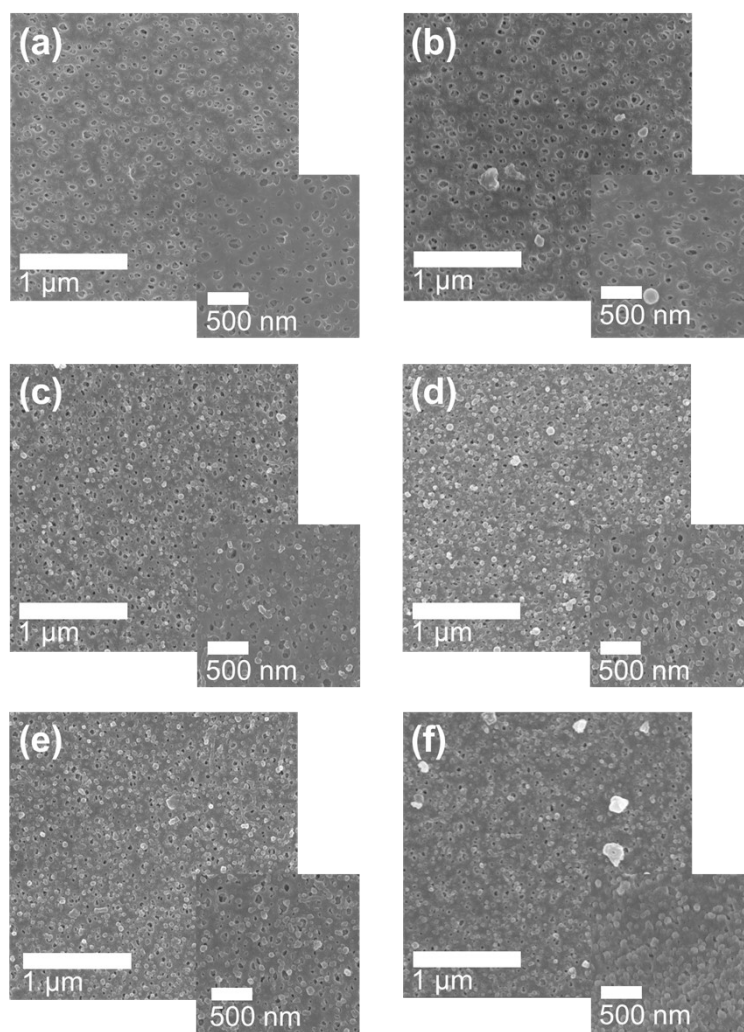

**Fig. S7** FESEM images of (a) pristine PSf, (b) SiO<sub>2</sub>\_4h\_PSf without APTES pre-treatment, (c) SiO<sub>2</sub>\_1h/PSf, (d) SiO<sub>2</sub>\_2h/PSf, (e) SiO<sub>2</sub>\_4h/PSf, and (f) SiO<sub>2</sub>\_6h/PSf porous supports.

As shown in **Fig. S7**, with the modification of SiO<sub>2</sub> mineralization, the PSf surface was gradually covered by ultrafine SiO<sub>2</sub> nanoparticles (50–100 nm) with a more curved and roughened surface structure. This intriguing and unique structure is more conducive to the formation of defect-free ultrathin crumpled nanofilms with a greater number of nano-voids for easier transport of water molecules. However, a continuous

mineralization layer could be formed without the APTES pre-treatment process, confirming the critical role of APTES for ultrafine silicification layer formation.<sup>3</sup>

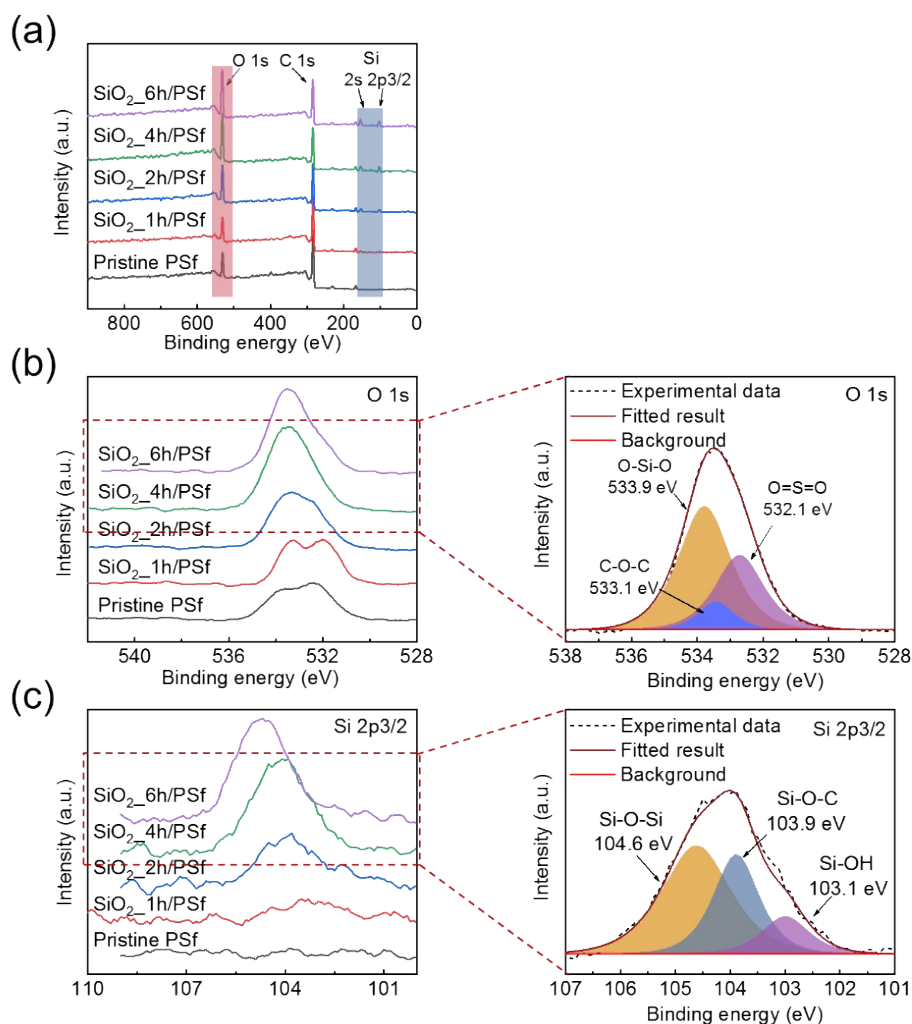

**Fig. S8** XPS characterization of (a) wide scan and core-level narrow scan of (b) O 1s and (c) Si 2p<sub>3/2</sub> elements of pristine PSf and SiO<sub>2</sub>/PSf ultrafiltration membranes.

As shown in **Fig. S8**, the full-scan XPS spectra (a) of the SiO<sub>2</sub>/PSf membranes display more intense O and Si peaks than that of the pristine PSf support because of the significantly enhanced (b) O-Si-O (533.9 eV), C-O-C (533.1 eV), (c) Si-O-Si (104.6 eV), and Si-OH (103.1 eV) in the high-resolution narrow scan spectra of O 1s and Si 2p<sub>3/2</sub>. These results confirm that the surface chemical composition changes with increasing mineralization duration. Notably, the appearance of Si-OH (103.1 eV) originates from the APTES monomer on the PSf support.<sup>4</sup>

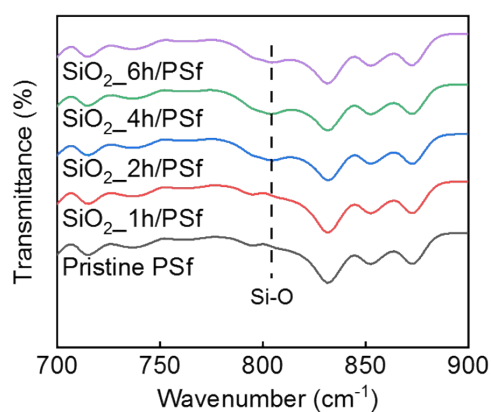

**Fig. S9** FTIR characterization of pristine PSf, SiO<sub>2</sub>\_1h/PSf, SiO<sub>2</sub>\_2h/PSf, SiO<sub>2</sub>\_4h/PSf, and SiO<sub>2</sub>\_6h/PSf membranes.

According to the FTIR spectrum, all porous PSf membranes exhibited almost similar absorption curves, except for the gradually increased absorption peak at 802 cm<sup>-1</sup> with prolonged silicification time, which is ascribed to the symmetrical stretching vibration of the Si-O bond. This result indicates that the SiO<sub>2</sub> nanoparticles could be deposited on the PSf substrates via an electrostatically induced self-assembled strategy.

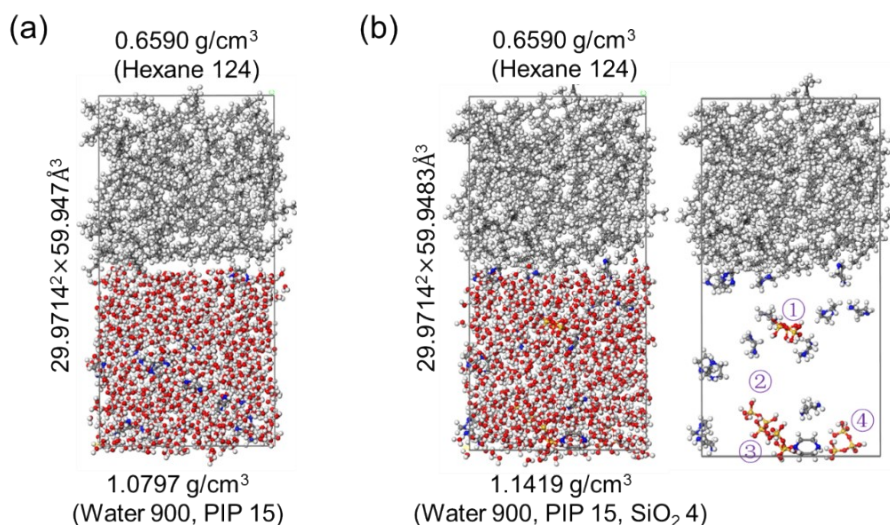

**Fig. S10** Profiles of MD simulation of (a) n-hexane-water system and (b) n-hexane-water (hide)-SiO<sub>2</sub> system.

A simulation cell with a size of  $29.9714 \text{ \AA} \times 29.9714 \text{ \AA} \times 59.9470 \text{ \AA}$  and periodic boundaries in all directions was prepared. In the hexane-water system, 15 PIP and 900 water molecules were included to model an aqueous phase with a density of  $1.0797 \text{ g}\cdot\text{cm}^{-3}$ , and 124 n-hexane molecules were included to model a hexane phase with a density of  $0.6590 \text{ g}\cdot\text{cm}^{-3}$ , as shown in **Fig. S10 (a)**. In the hexane-water-SiO<sub>2</sub> system, four SiO<sub>2</sub> molecules were distributed in the aqueous cell of the hexane-water system, as shown in **Fig. S10 (b)**. Besides, the center coordinate of four SiO<sub>2</sub> particles inside the n-hexane-water-SiO<sub>2</sub> system are as follows:  $\sigma$  (6.09605, 15.6308, 21.2589),  $\&$  (20.5660, 20.3620, 5.80330),  $\bullet$  (5.88577, 16.6026, 2.13580), and  $\circ$  (29.5996, 6.26715, 2.27770).

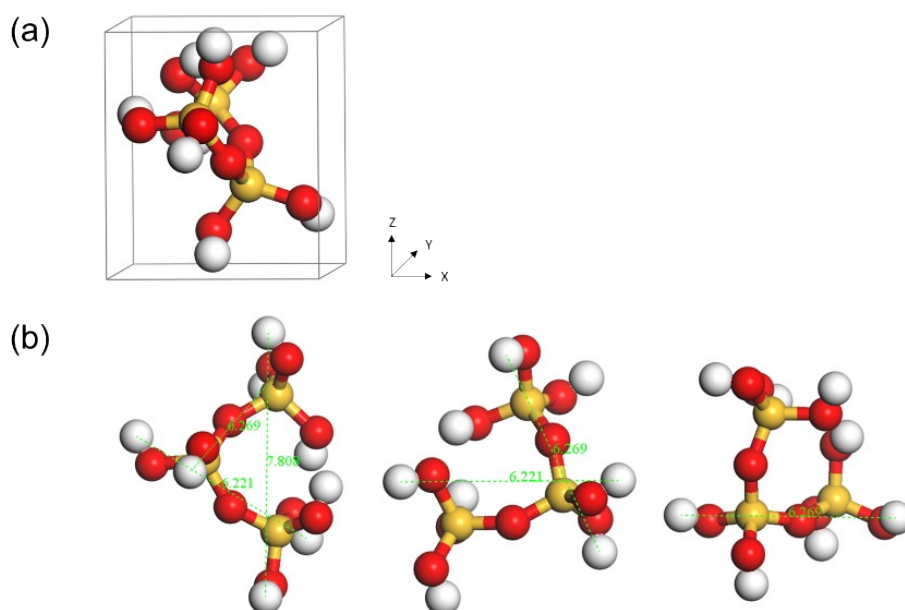

**Fig. S11.** (a) The size and volume of SiO<sub>2</sub> nanoparticles were calculated by locating them inside a rectangular parallelepiped (with the outer surface of the cuboid tangent to the outermost atoms of SiO<sub>2</sub>); (b) interatomic distance between the centers of atoms (the radius of atom ball size is 0.5 Å).

The volume of SiO<sub>2</sub> particles employed in this calculation was approximately 5.9 Å × 8.8 Å × 6.8 Å (calculated based on the size of the rectangular parallelepiped).

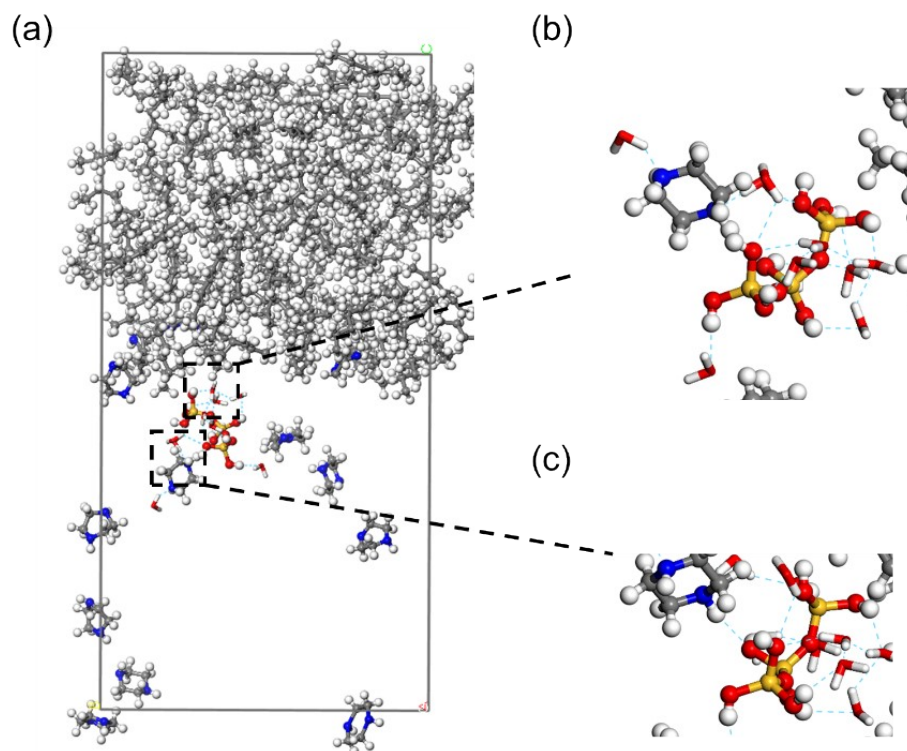

**Fig. S12** (a) Pictures of the n-hexane-water (hide) interface in the presence of  $\text{SiO}_2$  particles; chemical interactions of  $\text{SiO}_2$  particles with (b) water molecules and (c) PIP molecules via hydrogen bonding.

The  $\text{SiO}_2$  particle ( $\text{Si}_3\text{O}_{10}\text{H}_8$ ) with a molecular weight (Mw) of  $252.3 \text{ g}\cdot\text{mol}^{-1}$  was terminated with eight hydrogen atoms. Eight hydroxyl functional groups are located at the molecular edge and can form hydrogen bonds with water and PIP molecules.



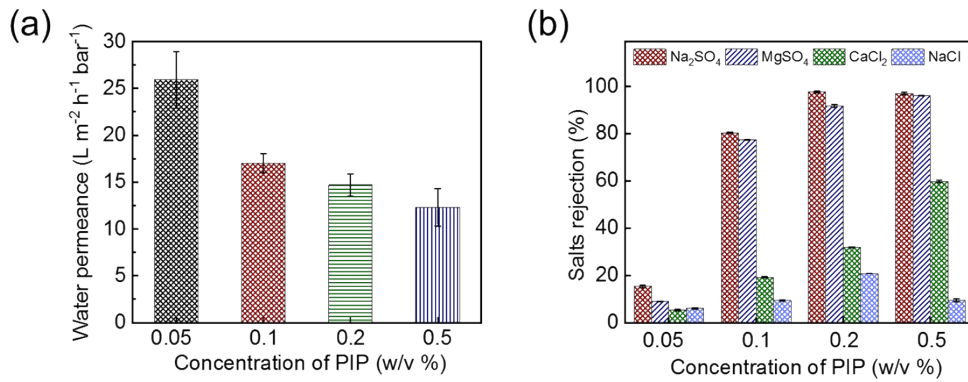

**Fig. S13** (a) Pure water permeance and (b) inorganic salt rejection ratio of PA\_SiO<sub>2</sub>\_4h/PSf TFC membrane fabricated at various PIP concentrations and the same TMC concentration of 0.1% (w/v) with a reaction duration of 30 s.

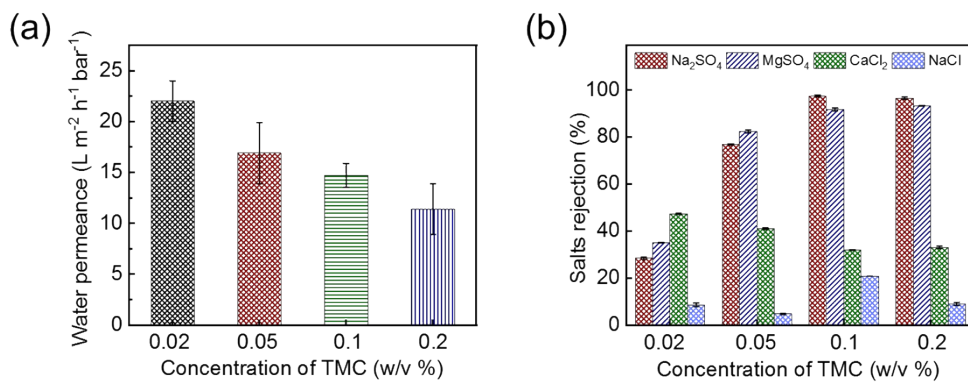

**Fig. S14** (a) Pure water permeance and (b) inorganic salt rejection ratio of PA\_SiO<sub>2</sub>\_4h/PSf TFC membranes fabricated at various TMC concentrations and the same PIP concentration of 0.2% (w/v) with a reaction duration of 30 s.

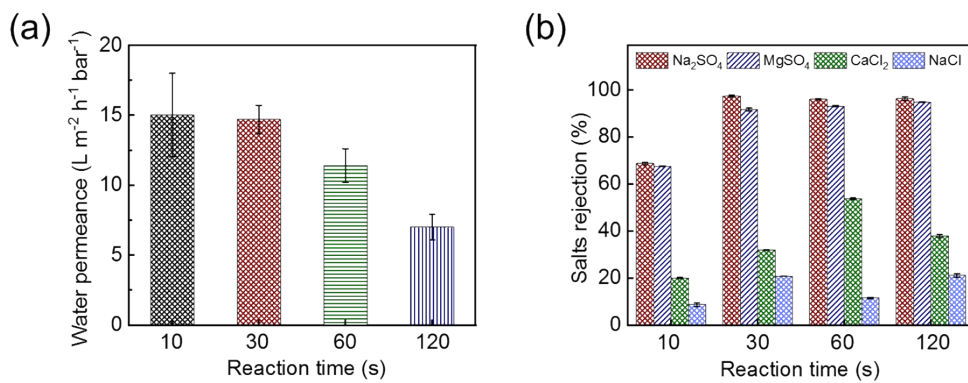

**Fig. S15** (a) Pure water permeance and (b) inorganic salt rejection ratio of PA\_SiO<sub>2</sub>\_4h/PSf TFC membranes fabricated at various reaction durations. All membranes were formed with the same PIP (0.2% (w/v)) and TMC (0.1% (w/v)) concentrations.

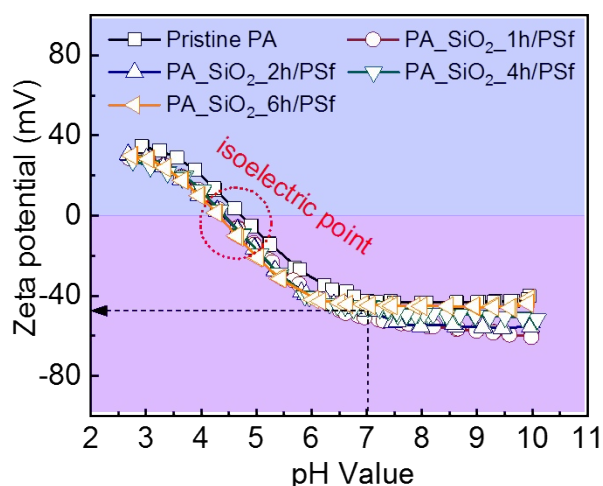

**Fig. S16** Surface potential of pristine PA and PA\_SiO<sub>2</sub>/PSf TFC membranes. All the measurements were performed at 398 K and repeated four times.

The membrane surface zeta potentials were estimated by measuring the zeta potentials in a background electrolyte solution of 1 mM KCl. According to the measured zeta potential data of the pristine PA and PA\_SiO<sub>2</sub>/PSf TFC membranes, all membranes exhibited typical negatively charged outermost PA surfaces in neutral environments because of the hydrolysis of acyl chloride.<sup>5</sup> The isoelectric point (IEP) value estimated from the above analysis was approximately 4.6. The related zeta potential value at pH = 7 was -49.4 mV.

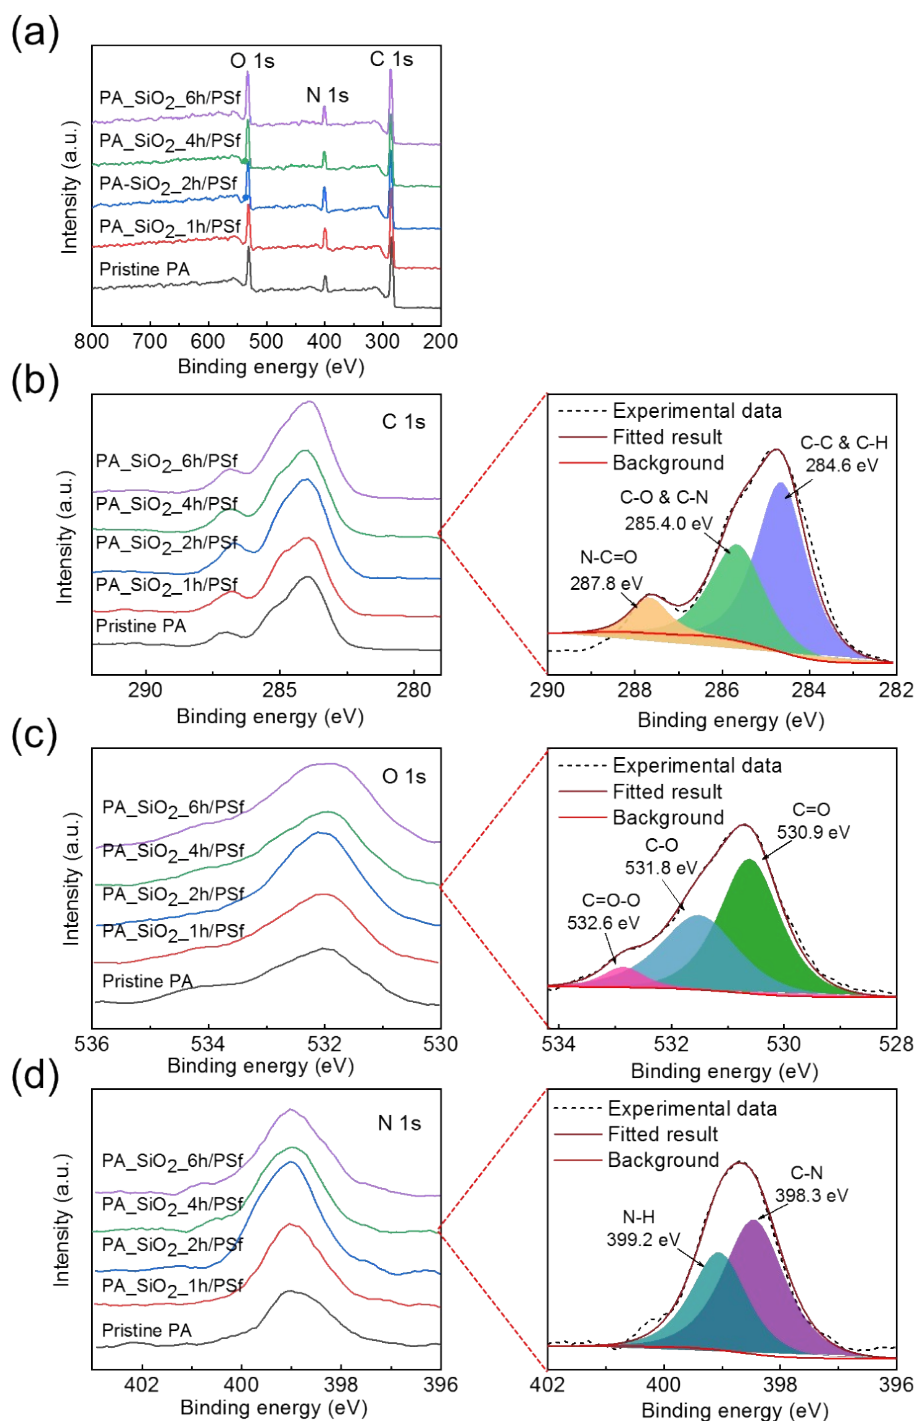

**Fig. S17** (a) XPS characterizations of (a) wide scan and core-level narrow scan of (b) C 1s, (c) O 1s, and (d) N 1s elements of pristine PA and PA\_SiO<sub>2</sub>/PSf TFC membranes.

The deconvoluted scan spectra of the PA-based TFC membranes exhibit typical peaks corresponding to N-C=O (287.8 eV), C-O and C-N (285.4 eV), C-C, and C-H (284.6 eV) for C 1s; C=O-O (532.6 eV), C-O (531.8 eV), and C=O (530.9 eV) for O 1s; N-H (399.2 eV) and C-N (398.3 eV) for N 1s. These peaks confirm the chemical composition of typical PA films fabricated by interfacial polymerization.<sup>6</sup>

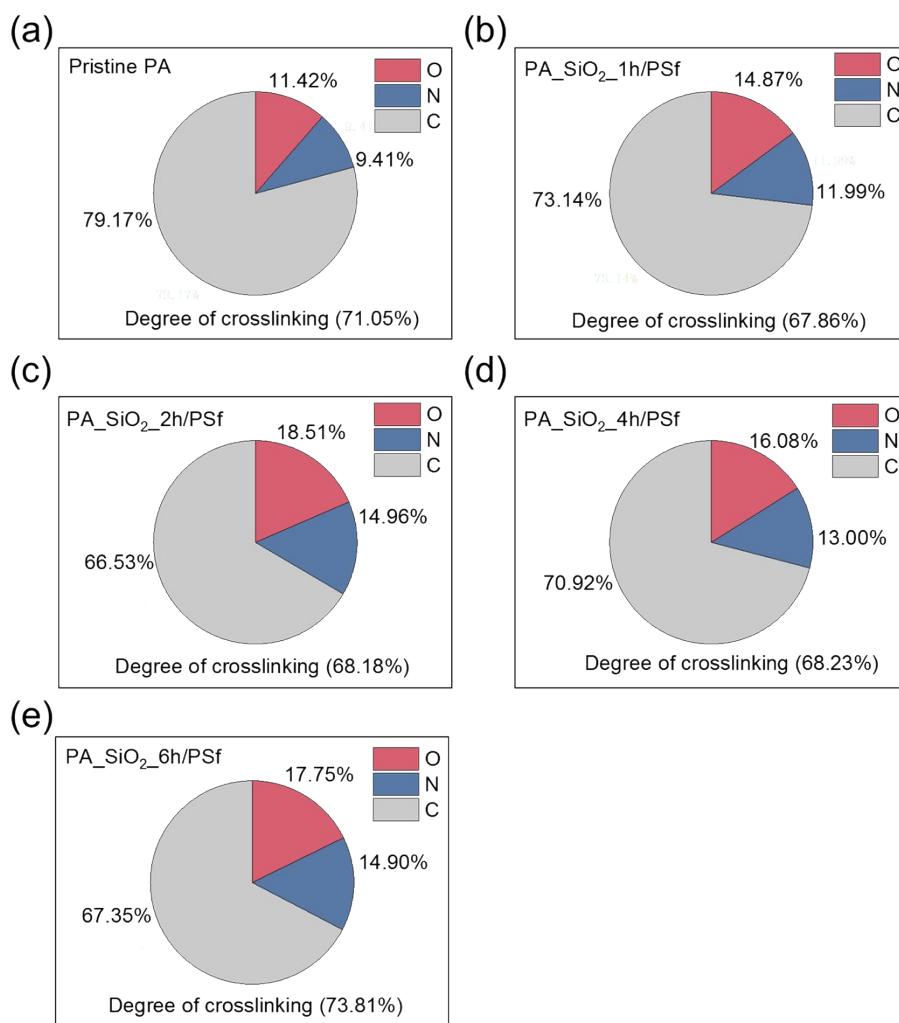

**Fig. S18** Crosslinking degree of pristine PA and PA<sub>2</sub>/PSf TFC membranes.

From the above results and **Fig. S18**, the PA-based TFC membrane exhibited a higher degree of crosslinking (~70%). However, the SiO<sub>2</sub>/PSf PA nanofilms with longer mineralization times (4 h and 6 h) exhibited a slightly compromised rejection ratio for divalent anions. This was because of the relatively loose-selective-PA nanofilm with enlarged pore size and free volume originating from the acyl chloride of TMC when in contact with the moistened SiO<sub>2</sub>/PSf supports.<sup>7</sup>

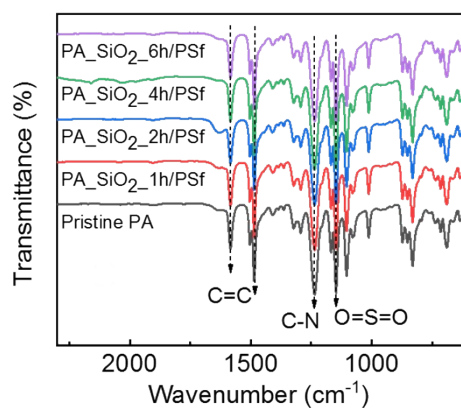

**Fig. S19** ATR-FTIR spectra of pristine PA and PA<sub>SiO<sub>2</sub></sub>/PSf TFC membranes.

According to the FTIR spectra of pristine PA and PA<sub>SiO<sub>2</sub></sub>/PSf TFC membranes, all PA membranes exhibited similar infrared absorption characteristic peaks. Specifically, the peaks located at 1580 cm<sup>-1</sup> and 1483 cm<sup>-1</sup> were attributed to the C=C bond in-plane aromatic PA, and the peak located at 1239 cm<sup>-1</sup> was attributed to C-N stretching, confirming the presence of the PA nanofilm on the PSf substrate.<sup>8</sup>



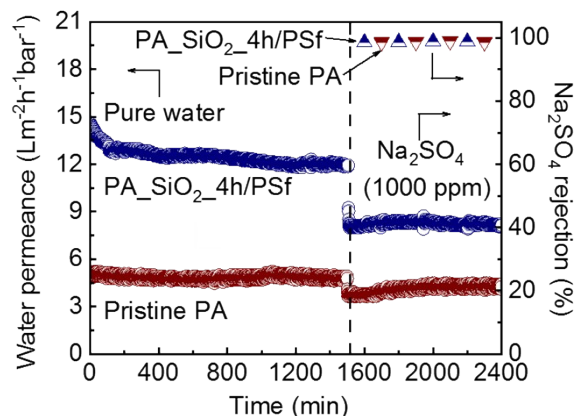

**Fig. S20** Long-term filtration of pristine PA and PA\_SiO<sub>2</sub>/PSf TFC membranes for pure water and 1000 ppm Na<sub>2</sub>SO<sub>4</sub> aqueous solution under 10 bar and 398 K for 2400 min.

The pure water permeance of the membrane decreased at the initial stage of the filtration experiment because of the well-known compaction effect. The water flux decreased from 15.2 to 14.5 L·m<sup>-2</sup>·h<sup>-1</sup>·bar<sup>-1</sup> during the first 30 min of the filtration test. After 1600 min long-term pure water filtration, the PA\_SiO<sub>2</sub>\_4h/PSf membrane still has acceptable water permeance of 12.3 L·m<sup>-2</sup>·h<sup>-1</sup>·bar<sup>-1</sup> and high rejection (99.0%) toward Na<sub>2</sub>SO<sub>4</sub>. In addition, the PA\_SiO<sub>2</sub>\_4h/PSf TFC membrane showed structural robustness similar to that of the pristine PA membrane.

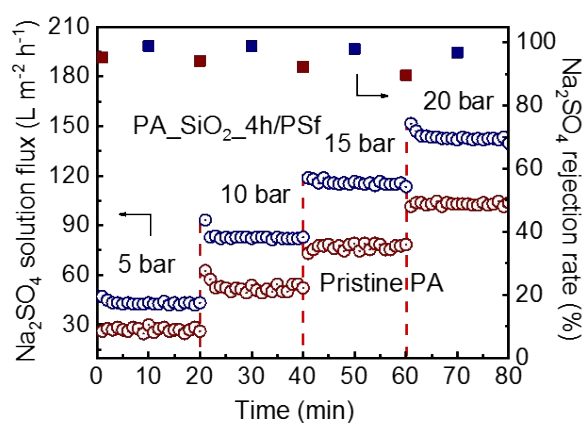

**Fig. S21** Perm-selectivity of pristine PA and PA\_SiO<sub>2</sub>\_4h/PSf TFC membranes toward Na<sub>2</sub>SO<sub>4</sub> aqueous solution (1000 ppm) under varied transmembrane pressure (5–20 bar).

With an increase in the applied pressure, the corresponding water flux of the TFC membranes increased, and the rejection was slightly compromised (**Fig. S21**). This was because of the synergistic effects of loose intermolecular chains of soft semi-aromatic PA nanofilms and the significant ion concentration polarization (ICP) under high pressures. Notably, both pristine PA and PA\_SiO<sub>2</sub>\_4h/PSf TFC membranes retained their structural integrity during the pressure cycling experiments.

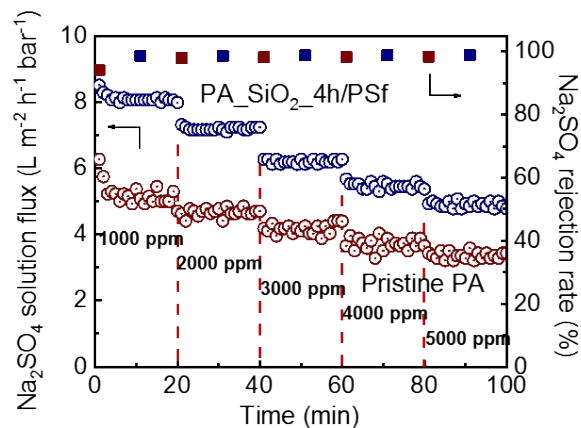

**Fig. S22** Influence of  $\text{Na}_2\text{SO}_4$  concentration on the perm-selectivity of the pristine PA and  $\text{PA\_SiO}_2\text{_4h/PSf}$  TFC membranes under the filtration condition of 10 bar, at 398 K.

We explored the influence of the  $\text{Na}_2\text{SO}_4$  concentration on the perm-selectivity of the pristine PA and  $\text{PA\_SiO}_2\text{_4h/PSf}$  TFC membranes (**Fig. S22**). The water flux decreased along with the gradually enhanced salt concentration because of the enhanced osmotic pressure. The water flux of the  $\text{PA\_SiO}_2\text{_4h/PSf}$  TFC membrane decreased from  $8.4 \text{ L}\cdot\text{m}^{-2}\cdot\text{h}^{-1}\cdot\text{bar}^{-1}$  to  $4.9 \text{ L}\cdot\text{m}^{-2}\cdot\text{h}^{-1}\cdot\text{bar}^{-1}$  under  $\text{Na}_2\text{SO}_4$  concentrations of 1000 ppm and 5000 ppm, respectively, while the  $\text{Na}_2\text{SO}_4$  rejection rate remained constant at approximately 98.8%. In addition, the resistance toward high-concentration salt illustrates the structural robustness of the  $\text{PA\_SiO}_2\text{_4h/PSf}$  TFC membrane.

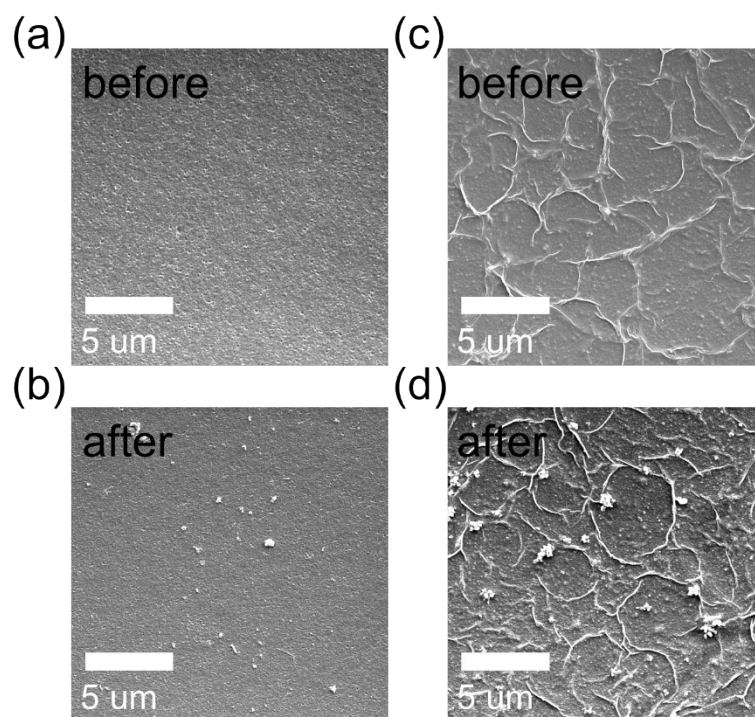

**Fig. S23** FESEM images with pristine PA (left-hand panel) and PA\_SiO<sub>2</sub>\_4h/PSf membranes (right-hand panel) before (a, c) and after (b, d) long-term pure water filtration.

The surface SEM images of the pristine PA and the optimum PA\_SiO<sub>2</sub>\_4h/PSf membranes after their long-term pure water (1600 min) and 1000 ppm Na<sub>2</sub>SO<sub>4</sub> filtration test (800 min) have been examined, and the results have been added in **Fig. S23**, which can be clearly seen that the surface microstructures were nearly remained before/after long-term filtration tests.

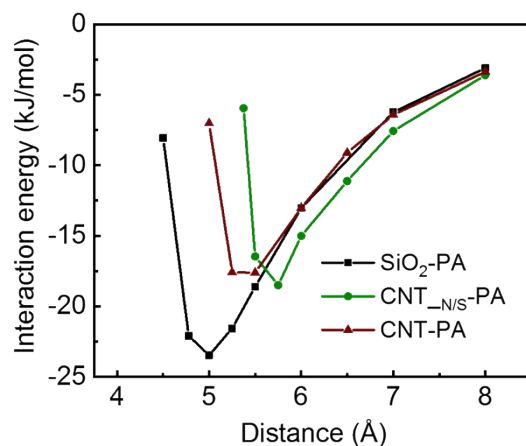

**Fig. S24** The distance-dependent interaction energy of the SiO<sub>2</sub>-PA, CNT<sub>N/S</sub>-PA, and CNT-PA systems.

From the MD simulation result, we can draw such a conclusion that the SiO<sub>2</sub>-PA has a higher interaction force than that of CNT<sub>N/S</sub>-PA and CNT-PA with lower interaction energy. The minimum interaction energy of SiO<sub>2</sub>-PA, CNT<sub>N/S</sub>-PA, and CNT-PA are -23.47, -18.41, and -17.61 kJ mol<sup>-1</sup> at the distance of 5 Å, 5.75 Å, and 5.5 Å, respectively. This result verifies the more intense interfacial connection between the newly-developed SiO<sub>2</sub> interlayer, owing to the superior hydrophilicity with large amounts of hydroxyl groups that interconnects with the active sites (carbonyl and amine groups) of PA.<sup>9, 10</sup>

**Table S1** Surface profiles of pristine PSf and SiO<sub>2</sub>\_4h/PSf porous membranes acquired from AFM characterization over a scanning area of 10 μm × 10 μm.

| <b>Sample</b>            | <b>RMS (nm)</b> | <b>Ra (nm)</b> | <b>Surface area (nm<sup>2</sup>)</b> |
|--------------------------|-----------------|----------------|--------------------------------------|
| PSf                      | 7.5             | 6.1            | 1.03 × 10 <sup>8</sup>               |
| SiO <sub>2</sub> _4h/PSf | 37.4            | 25.1           | 1.12 × 10 <sup>8</sup>               |

**Table S2** Atomic composition of porous supports calculated by XPS measurements.

| Sample                   | C (%) | O (%) | S (%) |         |         | Si (%)    |              |          |
|--------------------------|-------|-------|-------|---------|---------|-----------|--------------|----------|
|                          |       |       | S 2s  | S 2p3/2 | S total | Si 2s (%) | Si 2p3/2 (%) | Si total |
| PSf                      | 79.48 | 14.15 | 3.04  | 3.33    | 6.37    | 0         | 0            | 0        |
| SiO <sub>2</sub> _1h/PSf | 77.83 | 14.28 | 2.59  | 3.48    | 6.07    | 0.38      | 1.44         | 1.82     |
| SiO <sub>2</sub> _2h/PSf | 62.8  | 22.41 | 1.94  | 3.94    | 5.88    | 5.76      | 3.15         | 8.91     |
| SiO <sub>2</sub> _4h/PSf | 53.64 | 25.60 | 1.12  | 1.98    | 3.10    | 9.84      | 7.82         | 17.66    |
| SiO <sub>2</sub> _6h/PSf | 51.78 | 26.41 | 0.89  | 2.10    | 2.99    | 9.97      | 8.85         | 18.82    |

**Table S3** Surface properties of pristine PA and PA\_SiO<sub>2</sub>/PSf TFC membranes. These results were acquired from AFM measurements over a scanning area of 20 μm × 20 μm.

| <b>Sample</b>               | <b>Height (nm)</b> | <b>Surface area (nm<sup>2</sup>)</b> | <b>Ra (nm)</b> | <b>RMS (nm)</b> | <b>Surface pattern width (nm)</b> |
|-----------------------------|--------------------|--------------------------------------|----------------|-----------------|-----------------------------------|
| Pristine PA                 | 79.3               | 4.245 × 10 <sup>8</sup>              | 9.71           | 12.61           | ~ 80                              |
| PA_SiO <sub>2</sub> _1h/PSf | 171.5              | 4.257 × 10 <sup>8</sup>              | 15.42          | 22.33           | ~ 180                             |
| PA_SiO <sub>2</sub> _2h/PSf | 180.2              | 4.311 × 10 <sup>8</sup>              | 24.16          | 38.22           | ~ 200                             |
| PA_SiO <sub>2</sub> _4h/PSf | 243.5              | 4.362 × 10 <sup>8</sup>              | 72.22          | 75.90           | ~ 150                             |
| PA_SiO <sub>2</sub> _6h/PSf | 269.9              | 4.417 × 10 <sup>8</sup>              | 73.26          | 88.71           | ~ 200                             |



**Table S4** Summary of PIP storage capacity, PIP diffusion rate  $S_{PIP-O}$ , within the first 30 s), and relative monomer diffusion rate ( $D_r$ ; within the first 30 s) on various substrates.

| Sample                      | Storage capacity<br>( $\text{g}\cdot\text{m}^{-2}$ ) | Diffusion rate ( $\text{g}\cdot\text{L}^{-1}\cdot\text{min}^{-1}$ ) | Relative diffusion rate ( $\text{min}^{-1}$ ) |
|-----------------------------|------------------------------------------------------|---------------------------------------------------------------------|-----------------------------------------------|
| Pristine PA                 | 6.01                                                 | $24.18 \times 10^{-3}$                                              | 0.201                                         |
| PA_SiO <sub>2</sub> _4h/PSf | 6.26                                                 | $17.54 \times 10^{-3}$                                              | 0.139                                         |
| PA_SiO <sub>2</sub> _6h/PSf | 6.35                                                 | $22.06 \times 10^{-3}$                                              | 0.173                                         |

**Table S5** The rejections of TFC PA membranes for different neutral sugars solutes.

| <b>Samples</b>              | <b>Glycerol</b> | <b>Glucose</b> | <b>Sucrose</b> | <b>Raffinose</b> |
|-----------------------------|-----------------|----------------|----------------|------------------|
| Pristine PA                 | 20.06           | 71.25          | 95.27          | 95.32            |
| PA_SiO <sub>2</sub> _1h/PSf | 20.17           | 71.31          | 93.88          | 93.11            |
| PA_SiO <sub>2</sub> _2h/PSf | 16.95           | 68.31          | 95.77          | 94.41            |
| PA_SiO <sub>2</sub> _4h/PSf | 13.47           | 62.78          | 95.38          | 94.92            |
| PA_SiO <sub>2</sub> _6h/PSf | 6.86            | 47.91          | 91.94          | 91.97            |

**Table S6** Atomic composition and degree of crosslinking of pristine PA and PA\_SiO<sub>2</sub>/PSf membranes.

| <b>Sample</b>               | <b>C (%)</b> | <b>O (%)</b> | <b>N (%)</b> | <b>O/N ratio</b> | <b>Degree of crosslinking (%)</b> |
|-----------------------------|--------------|--------------|--------------|------------------|-----------------------------------|
| Pristine PA                 | 70.01        | 16.93        | 13.06        | 1.2963           | 61.30                             |
| PA_SiO <sub>2</sub> _1h/PSf | 73.14        | 14.87        | 11.99        | 1.2401           | 67.86                             |
| PA_SiO <sub>2</sub> _2h/PSf | 66.53        | 18.51        | 14.96        | 1.2373           | 68.18                             |
| PA_SiO <sub>2</sub> _4h/PSf | 70.92        | 16.08        | 13.00        | 1.2369           | 68.23                             |
| PA_SiO <sub>2</sub> _6h/PSf | 67.35        | 17.75        | 14.90        | 1.1913           | 73.81                             |

**Table S7** The MWCO values and the mean pore size of the as-formed PA-based membranes.

| <b>Samples</b>              | <b>MWCO<br/>(Da)</b> | <b>50% rejection<br/>(Da)</b> | <b>84.13% rejection<br/>(Da)</b> | <b>d<sub>p</sub> (nm)</b> | <b>d<sub>c</sub> (nm)</b> | <b>σ<sub>p</sub></b> |
|-----------------------------|----------------------|-------------------------------|----------------------------------|---------------------------|---------------------------|----------------------|
| Pristine PA                 | 304                  | 143.4                         | 266.5                            | 0.3217                    | 0.4293                    | 1.3345               |
| PA_SiO <sub>2</sub> _1h/PSf | 310                  | 143.4                         | 272.4                            | 0.3217                    | 0.4337                    | 1.3482               |
| PA_SiO <sub>2</sub> _2h/PSf | 307                  | 148.8                         | 272.4                            | 0.3273                    | 0.4337                    | 1.3251               |
| PA_SiO <sub>2</sub> _4h/PSf | 318                  | 157.4                         | 286.6                            | 0.3360                    | 0.4440                    | 1.3214               |
| PA_SiO <sub>2</sub> _6h/PSf | 334                  | 187.8                         | 313.2                            | 0.3647                    | 0.4628                    | 1.2690               |

**Table S8** Performance of reported state-of-the-art nanofiltration membranes.

| Membrane and description                                                                                                                           | Membrane abbreviation                           | PWP<br>(L·m <sup>2</sup> ·h <sup>-1</sup> ·bar <sup>-1</sup> ) | Salt rejection (%)              |                   |      | Cl <sup>-</sup> /SO <sub>4</sub> <sup>2-</sup><br>Selectivity | References |
|----------------------------------------------------------------------------------------------------------------------------------------------------|-------------------------------------------------|----------------------------------------------------------------|---------------------------------|-------------------|------|---------------------------------------------------------------|------------|
|                                                                                                                                                    |                                                 |                                                                | Na <sub>2</sub> SO <sub>4</sub> | MgSO <sub>4</sub> | NaCl |                                                               |            |
| Commercial membranes                                                                                                                               | DOW FILMTEC™ NF70                               | 7.2                                                            | 97.0                            | 70.0              | 70.0 | 10.0                                                          | 11         |
|                                                                                                                                                    | DOW FILMTEC™ NF90                               | 6.7                                                            | 98.0                            | 90.0              | 90.0 | 5.00                                                          |            |
|                                                                                                                                                    | GE-Osmonics DL                                  | 10.0                                                           | 96.0                            | 96.0              | 40.0 | 15.0                                                          |            |
|                                                                                                                                                    | GE-Osmonics HL                                  | 6.9                                                            | 97.0                            | 97.0              | 33.0 | 23.3                                                          |            |
|                                                                                                                                                    | Synder NFX                                      | 2.4                                                            | 99.0                            | 99.0              | 40.0 | 60.0                                                          |            |
|                                                                                                                                                    | Synder NFW                                      | 5.4                                                            | 97.0                            | 97.0              | 20.0 | 26.7                                                          |            |
| NF membranes with cellulose nanocrystals as an interlayer                                                                                          | PA50/CNC/PES                                    | 34                                                             | 97.7                            | 86                | 6.5  | 40.7                                                          | 12         |
| MXene Nanosheet Templated Nanofiltration Membranes                                                                                                 | TFC <sub>n</sub> O                              | 45.7                                                           | 96.0                            | 94                | 18   | 20.5                                                          | 13         |
| TFC NF membranes fabricated from polymeric amine, polyethylenimine embedded with monomeric amine, And piperazine for enhanced salt separation      | PEI <sub>2,4</sub> -PIP <sub>0,6</sub> /TMC     | 5.1                                                            | 50.0                            | 74                | 65.0 | 0.70                                                          | 14         |
| Enhancing the performance of polyethylenimine-modified NF membranes by coating a layer of sulfonated poly(ether ketone) for removing sulfamerazine | PEI <sub>0,6</sub> /TMC-PIP <sub>2,4</sub> /TMC | 1.2                                                            | 68.0                            | 94                | 78.0 | 0.69                                                          |            |
| Polyamide nanofiltration membrane with highly uniform sub-nanometre pores for sub-1 Å precision separation                                         | SPEEK/PEI-PI # 5 m                              | 3.4                                                            | 69.7                            | > 90              | 57.6 | 1.4                                                           | 15         |
|                                                                                                                                                    | SPEEK/PEI-PI # 10 m                             | 2.9                                                            | 86.6                            | > 90              | 60.8 | 2.9                                                           |            |
|                                                                                                                                                    | SPEEK/PEI-PI # 30 m                             | 2.3                                                            | 86.6                            | > 90              | 66.9 | 2.5                                                           |            |
|                                                                                                                                                    | SPEEK/PEI-PI # 60 m                             | 2.0                                                            | 86.6                            | > 90              | 70.4 | 2.2                                                           |            |
| pH-responsive NF membranes containing carboxybetaine with tunable ion selectivity for charge-based separation                                      | (PIP+SDS)/TMC                                   | 17.1                                                           | 99.6                            | 98.2              | 27.0 | 182                                                           | 16         |
| Oligo-ethylene-glycol-based thin-film composite NF membranes for effective separation of mono-/di-valent anions                                    | PCHM1                                           | 2.2                                                            | 83.4                            | 58                | 5.2  | 5.7                                                           | 17         |
|                                                                                                                                                    | PCHM2                                           | 3.8                                                            | 74.4                            | 56                | 4.4  | 3.7                                                           |            |
|                                                                                                                                                    | PA@EDA 0.15%                                    | 4.2                                                            | 98.0                            | -                 | 24.8 | 37.6                                                          |            |
|                                                                                                                                                    | PA@EDA 1%                                       | 1.1                                                            | 91.2                            | -                 | 27.6 | 8.2                                                           |            |
|                                                                                                                                                    | PA@EDA 2%                                       | 0.6                                                            | 61.4                            | -                 | 27.5 | 1.9                                                           |            |
|                                                                                                                                                    | PA@DCA 0.2%                                     | 8.3                                                            | 98.5                            | -                 | 12.6 | 58.3                                                          |            |
| Alginate Hydrogel Assisted Controllable Interfacial Polymerization for High-Performance Nanofiltration Membranes                                   | PA@DCA 1.5%                                     | 1.5                                                            | 96.5                            | -                 | 17.5 | 23.6                                                          | 18         |
|                                                                                                                                                    | PA@DCA 2.5%                                     | 1.3                                                            | 95.0                            | -                 | 13.2 | 17.4                                                          |            |
|                                                                                                                                                    | SA-15.5                                         | 30.3                                                           | 97.2                            | 82.7              | 15.2 | 30.3                                                          |            |
| TiO <sub>2</sub> @graphene oxide incorporated antifouling nanofiltration membrane                                                                  | NFM-3 # 0.2 wt% TiO <sub>2</sub> @GO            | 5.6                                                            | 98.8                            | 58                | 35   | 54.17                                                         | 20         |

|                                                                                                                       |                             |       |      |      |      |       |           |
|-----------------------------------------------------------------------------------------------------------------------|-----------------------------|-------|------|------|------|-------|-----------|
| Ultrathin PA membrane with decreased porosity and superior antifouling properties                                     | BTC-PIP                     | 8.7   | 99.1 | 99.4 | 83.3 | 18.6  | 21        |
| Nanovoid membranes embedded with hollow zwitterionic nanocapsules                                                     | TFNM with HZNCs             | 12.2  | 94.7 | 93.4 | 38.2 | 11.7  | 22        |
|                                                                                                                       | NMP-act.                    | 10.9  | 99.9 | 99.9 | 94.3 | 57    |           |
| MPD based nanofiltration membrane                                                                                     | DMF-act.                    | 12.1  | 99.9 | 99.9 | 91.4 | 86    | 23        |
|                                                                                                                       | DMSO-act.                   | 14.5  | 99.9 | 99.9 | 85.1 | 149   |           |
| Polydopamine-coated silica nanoparticles embedded thin-film nanocomposite nanofiltration membranes                    | TFN <sub>PDA-SiNPs</sub>    | 13.3  | 97.0 | 94.0 | 35.0 | 21.7  | 24        |
| Polyphenol intermediate layer for nanofiltration                                                                      | NFM-15                      | 23.7  | 99.4 | 99.4 | 33.4 | 114   | 25        |
| Phosphonium modification leads to ultrapermeable antibacterial polyamide composite membranes with unreduced thickness | THPC-5                      | 50.5  | 98.4 | 93.8 | 22.0 | 48.8  | 26        |
| Preparation of TFC NF membranes with improved structural stability through the mediation of polydopamine              | PA/PA-PES                   | 11.4  | 93.5 | 82.4 | 31.0 | 10.6  | 27        |
|                                                                                                                       | PA/PES                      | 14.6  | 83.4 | 70.6 | 16.9 | 5.0   |           |
| Tuning the functional groups of carbon quantum dots in thin-film nanocomposite membranes for nanofiltration           | PA-TFC                      | 3.0   | 95.5 | 89.0 | 30.2 | 15.5  |           |
|                                                                                                                       | TFN-SCQD                    | 7.0   | 93.8 | 82.0 | 8.8  | 14.7  | 28        |
|                                                                                                                       | TFN-NCQD                    | 5.2   | 91.7 | 90.0 | 30.5 | 8.4   |           |
|                                                                                                                       | TFN-CCQD                    | 6.1   | 93.6 | 87.0 | 16.8 | 13.0  |           |
| Thin-film composite membranes with aqueous template-induced surface nanostructures for enhanced NF                    | TFC-R                       | 21.3  | 99.4 | -    | 43.5 | 94.2  | 29        |
|                                                                                                                       | TFC-T                       | 5.7   | 98.5 | 98.5 | 48.3 | 34.5  |           |
| SDS-intervened NF membrane                                                                                            | TFC-control                 | 4.9   | 97.2 | 93.4 | 40.5 | 21.2  | 30        |
|                                                                                                                       | TFC-SDS                     | 7.5   | 92.3 | 93.8 | 47.0 | 6.9   |           |
| PD/SWCNTs film supported ultrathin polyamide NF membrane                                                              | PD/SWCNTs                   | *40.2 | 95.9 | 94.1 | 22.7 | 18.9  | 31        |
| Sub-5 nm polyamide nanofilm                                                                                           | NFM #1                      | 68.0  | 96   | 84.8 | 9.8  | 22.55 | 32        |
| PDA inter-mediated nanofilm                                                                                           | PA/PD-PES                   | 11.4  | 93.5 | 82.4 | 31   | 10.6  | 33        |
| CNTs intermediated nanofiltration membrane                                                                            | TFC-2                       | 21    | 98.5 | 98.3 | 18.8 | 54.1  |           |
|                                                                                                                       | PA_SiO <sub>2</sub> _4h/PSf | 14.5  | 98.7 | 97.9 | 20.8 | 60.9  |           |
| SiO <sub>2</sub> inter-modulated PA-NF membrane                                                                       | PA_SiO <sub>2</sub> _6h/PSf | 20.6  | 94.7 | 91.6 | 13.2 | 16.4  | This work |
|                                                                                                                       | Pristine PA                 | 4.8   | 98.8 | 91.4 | 21.2 | 65.8  |           |

\* Water permeance of NaCl feed was considered as the pure water permeance.

## References

1. Y. Lin, M. S. Salem, L. Zhang, Q. Shen, A. H. El-shazly, N. Nady and H. Matsuyama, *J. Membr. Sci.*, 2020, **606**, 118141.
2. T. Istirokhatun, Y. Lin, S. Wang, Q. Shen, J. Segawa, K. Guan and H. Matsuyama, *Chem. Eng. J.*, 2021, **417**, 127903.
3. L. Zhang, Y. Lin, H. Wu, L. Cheng, Y. Sun, T. Yasui, Z. Yang, S. Wang, T. Yoshioka and H. Matsuyama, *J. Mater. Chem. A*, 2019, **7**, 24569-24582.
4. C. C. Carcouet, M. W. van de Put, B. Mezari, P. C. Magusin, J. Laven, P. H. Bomans, H. Friedrich, A. C. Esteves, N. A. Sommerdijk, R. A. van Benthem and G. de With, *Nano Lett.*, 2014, **14**, 1433-1438.
5. S. Yuan, G. Zhang, J. Zhu, N. Mamrol, S. Liu, Z. Mai, P. Van Puyvelde and B. Van der Bruggen, *J. Mater. Chem. A*, 2020, **8**, 3238-3245.
6. C. Jiang, L. Zhang, P. Li, H. Sun, Y. Hou and Q. J. Niu, *ACS Appl. Mater. Interfaces*, 2020, **12**, 25304-25315.
7. B. Yuan, S. Zhao, P. Hu, J. Cui and Q. J. Niu, *Nat. Commun.*, 2020, **11**, 1-12.
8. Y. Zhu, P. Dou, H. He, H. Lan, S. Xu, Y. Zhang, T. He and J. Niu, *Sep. Purif. Technol.*, 2020, **239**, 116528.
9. M. Wang, W. Dong, Y. Guo, Z. Zhai, Z. Feng, Y. Hou, P. Li and Q. J. Niu, *Desalination*, 2021, **513**, 114836.
10. Y. Gong, S. Gao, Y. Tian, Y. Zhu, W. Fang, Z. Wang and J. Jin, *J. Membr. Sci.*, 2020, **600**, 117874.
11. Y.-J. Tang, Z.-L. Xu, S.-M. Xue, Y.-M. Wei and H. Yang, *J. Membr. Sci.*, 2016, **498**, 374-384.
12. J.-J. Wang, H.-C. Yang, M.-B. Wu, X. Zhang and Z.-K. Xu, *J. Mater. Chem. A*, 2017, **5**, 16289-16295.
13. D. Xu, X. Zhu, X. Luo, Y. Guo, Y. Liu, L. Yang, X. Tang, G. Li and H. Liang, *Environ. Sci. Technol.*, 2021, **55**, 1270-1278.
14. D. Wu, S. Yu, D. Lawless and X. Feng, *React. Funct. Polym.*, 2015, **86**, 168-183.
15. S. Zhao, Y. Yao, C. Ba, W. Zheng, J. Economy and P. Wang, *J. Membr. Sci.*, 2015, **492**, 620-629.
16. Y. Liang, Y. Zhu, C. Liu, K. R. Lee, W. S. Hung, Z. Wang, Y. Li, M. Elimelech, J. Jin and S. Lin, *Nat. Commun.*, 2020, **11**, 1-9.
17. X.-D. Weng, X.-J. Bao, H.-D. Jiang, L. Chen, Y.-L. Ji, Q.-F. An and C.-J. Gao, *J. Membr. Sci.*, 2016, **520**, 294-302.
18. D. Ren, X.-T. Bi, T.-Y. Liu and X. Wang, *J. Mater. Chem. A*, 2019, **7**, 1849-1860.
19. Z.-Y. Ma, Y.-R. Xue and Z.-K. Xu, *Membranes*, 2021, **11**, 1-11.
20. J. Wang, Y. Wang, J. Zhu, Y. Zhang, J. Liu and B. Van der Bruggen, *J. Membr. Sci.*, 2017, **533**, 279-288.
21. B. Yuan, C. Jiang, P. Li, H. Sun, P. Li, T. Yuan, H. Sun and Q. J. Niu, *ACS Appl. Mater. Interfaces*, 2018, **10**, 43057-43067.
22. Z. Sun, Q. Wu, C. Ye, W. Wang, L. Zheng, F. Dong, Z. Yi, L. Xue and C. Gao, *Nano Lett.*, 2019, **19**, 2953-2959.
23. M. G. Shin, S. J. Kwon, H. Park, Y.-I. Park and J.-H. Lee, *J. Membr. Sci.*, 2020, **595**, 117590.
24. M. B. M. Y. Ang, C. A. Trilles, M. R. De Guzman, J. M. Pereira, R. R. Aquino, S.-H. Huang, C.-C. Hu, K.-R. Lee and J.-Y. Lai, *Sep. Purif. Technol.*, 2019, **224**, 113-120.
25. H. Sun, J. Liu, X. Luo, Y. Chen, C. Jiang, Z. Zhai and Q. J. Niu, *Desalination*, 2020, **488**, 114525.
26. H. Peng, W. H. Zhang, W. S. Hung, N. Wang, J. Sun, K. R. Lee, Q. F. An, C. M. Liu and Q. Zhao,

- Adv. Mater.*, 2020, **32**, e2001383.
27. Y. Li, Y. Su, J. Li, X. Zhao, R. Zhang, X. Fan, J. Zhu, Y. Ma, Y. Liu and Z. Jiang, *J. Membr. Sci.*, 2015, **476**, 10-19.
  28. M. Wu, J. Yuan, H. Wu, Y. Su, H. Yang, X. You, R. Zhang, X. He, N. A. Khan, R. Kasher and Z. Jiang, *J. Membr. Sci.*, 2019, **576**, 131-141.
  29. C. Wei, Z. He, L. Lin, Q. Cheng, K. Huang, S. Ma and L. Chen, *J. Membr. Sci.*, 2018, **563**, 752-761.
  30. H. Sun and P. Wu, *J. Membr. Sci.*, 2018, **564**, 394-403.
  31. Y. Zhu, W. Xie, S. Gao, F. Zhang, W. Zhang, Z. Liu and J. Jin, *Small*, 2016, **12**, 5034-5041.
  32. S. Pulak, M. Solagna, R. Santanu, A. Vasista, K. A. Reddy and S. Karan, *J. Mater. Chem. A*, 2021, **9**, 20714-20724.
  33. C. Ji, Z. Zhai, C. Jiang, P. Hu, S. Zhao, S. Xue, Z. Yang, T. He and Q. J. Niu, *Desalination*, 2021, **500**, 114869.
